# Supplementary material for: Profiling of Chromatin Accessibility in Pigs across Multiple Tissues and Developmental Stages
Source: MDPI journal article supplement (doi:10.3390/ijms241311076), 2023-07-04
Supplement: s1 [file s1]

## Supplementary information

### Supplementary figures

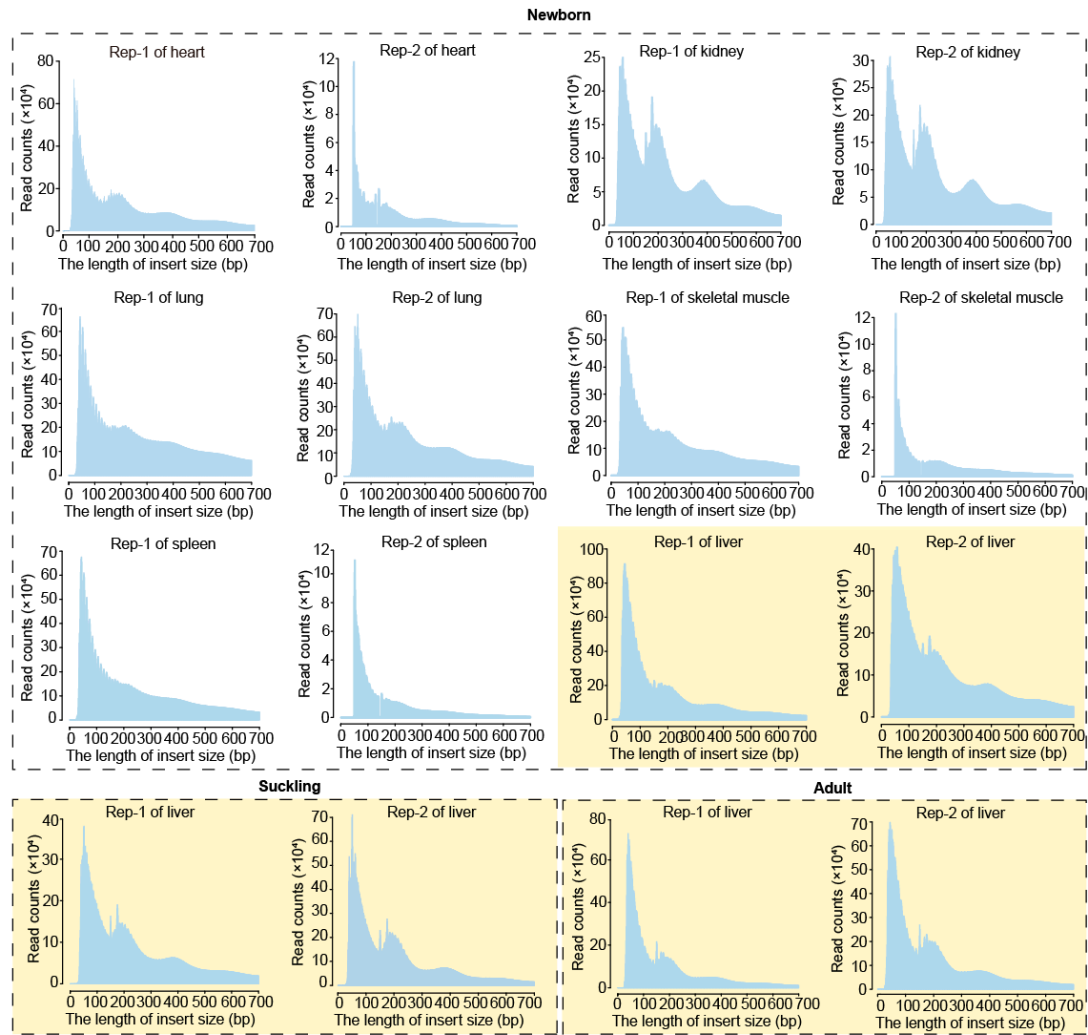

**Figure S1. Insert size distribution of all samples ( $n = 16$ ). The yellow squares indicate liver samples across developmental stages (i.e., newborn, suckling, and adult).**

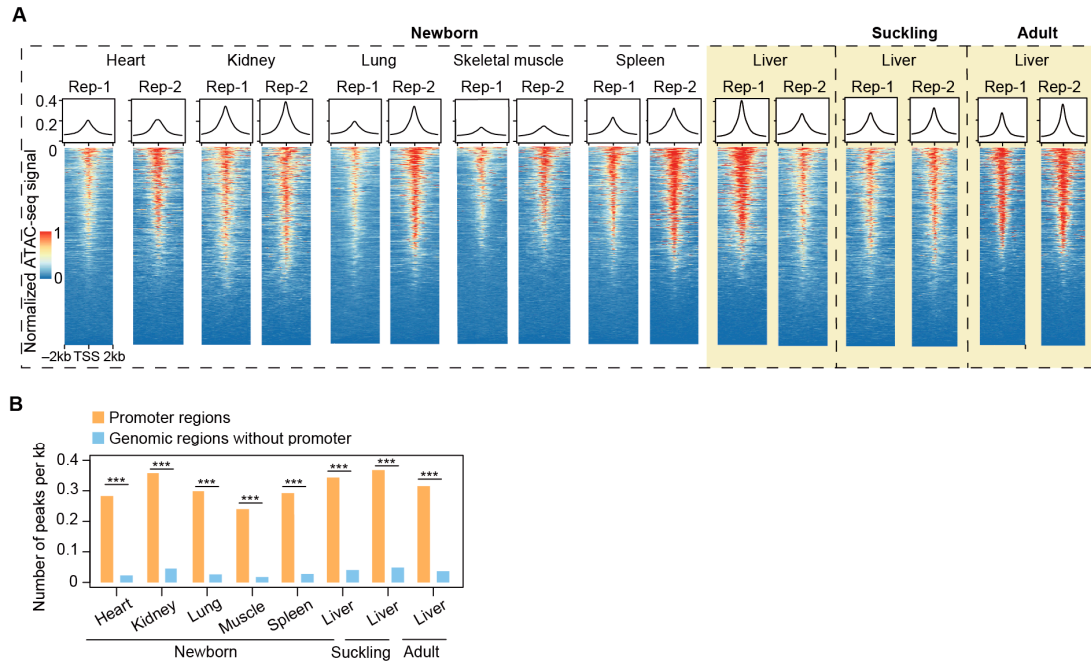

**Figure S2. The normalized ATAC-seq signal enriched in TSS and the density of peaks show higher levels in promoter regions than other genomic regions across samples. (A)** Line charts (top) and heatmaps (bottom), sorted by normalized ATAC-seq signal intensity, depicting the enrichment of normalized ATAC-seq signal centered on TSS across samples ( $n = 16$ ). The yellow squares indicate liver samples across developmental stages (i.e., newborn, suckling, and adult). **(B)** The number of peaks per kb are higher in promoter regions (orange) than other genomic regions without promoters (blue;  $***p < 0.001$ ).

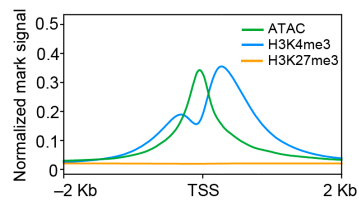

**Figure S3. The two types of histone marks (H3K4me3, H3K27me3) for two replicates of liver tissue from pigs at six months were downloaded. The normalized ATAC (green), H3K4me3 (blue) and H3K27me3 (yellow) signal depicting around the TSS of PCGs ( $n = 22,040$ ).**



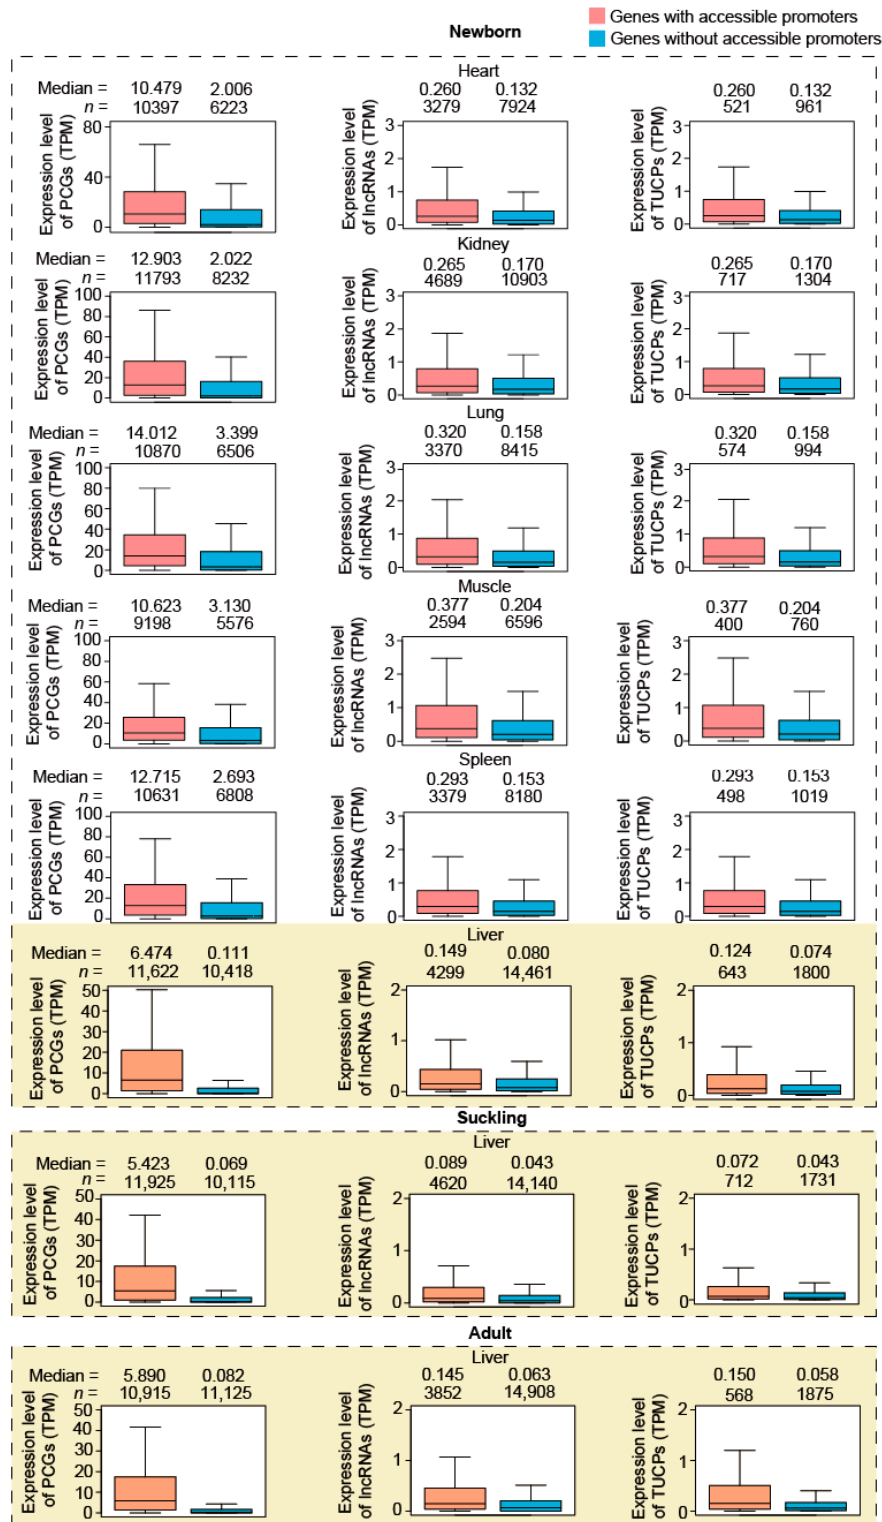

**Figure S6. Expression levels (TPM) of PCGs (left), lncRNAs (middle), and TUCPs (right) with accessible promoters showed higher expression than those with no accessible promoters across samples ( $n = 16$ ). Gene numbers are indicated above the plots. Yellow squares indicate liver samples across developmental stages (i.e., newborn, suckling, and adult).**

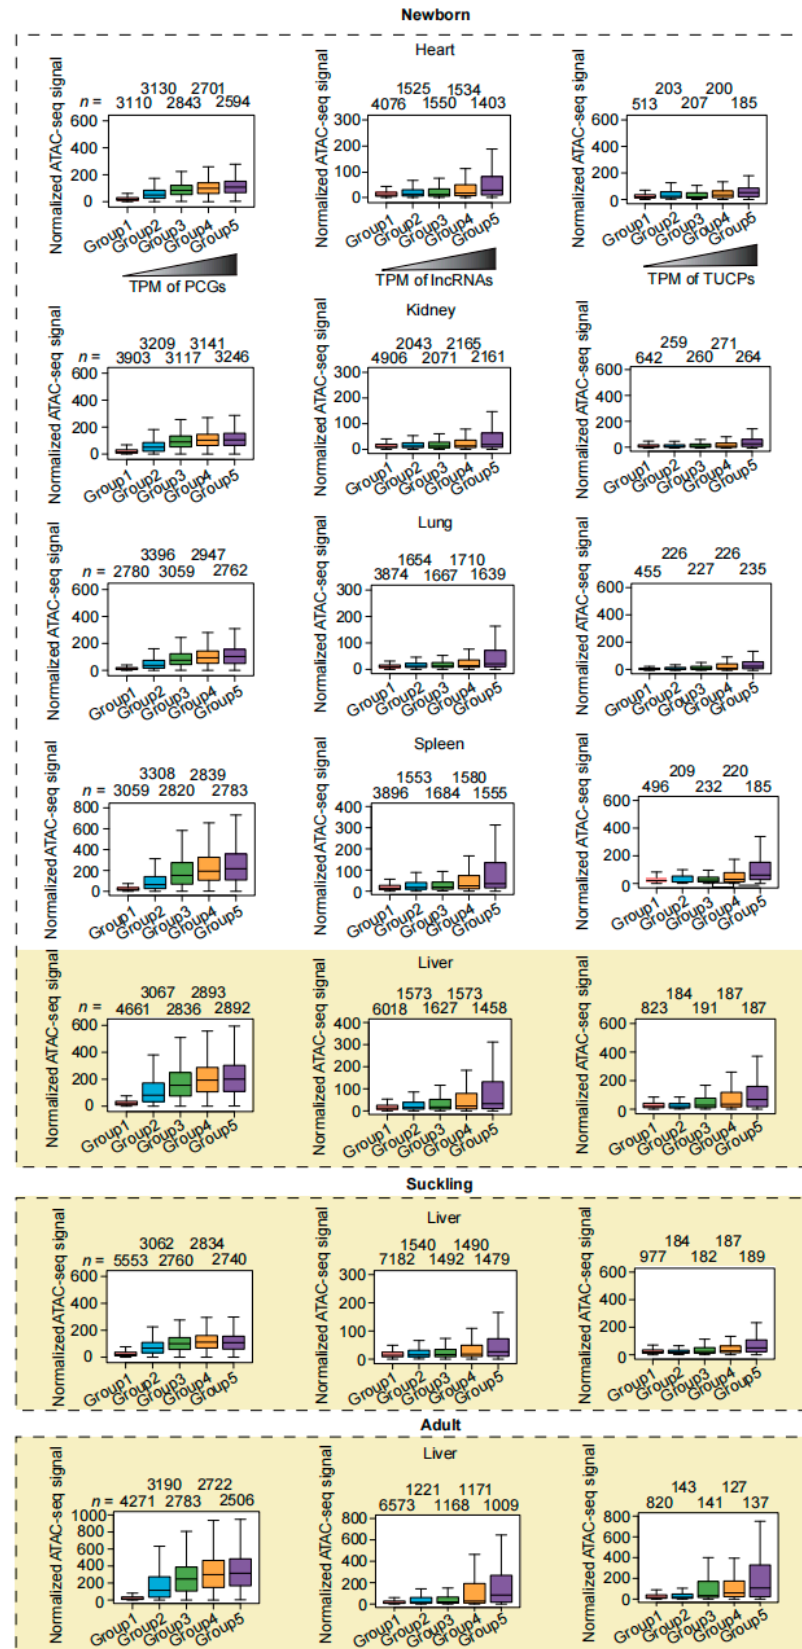

**Figure S7. Normalized ATAC-seq signals of PCGs (left), lncRNAs (middle), and TUCPs (right) increased with expression level.** Genes were classified into five groups, with expression increasing from group 1 to 5. Gene numbers are indicated above the plots.

The yellow squares indicate liver samples across developmental stages (i.e., newborn, suckling, and adult).

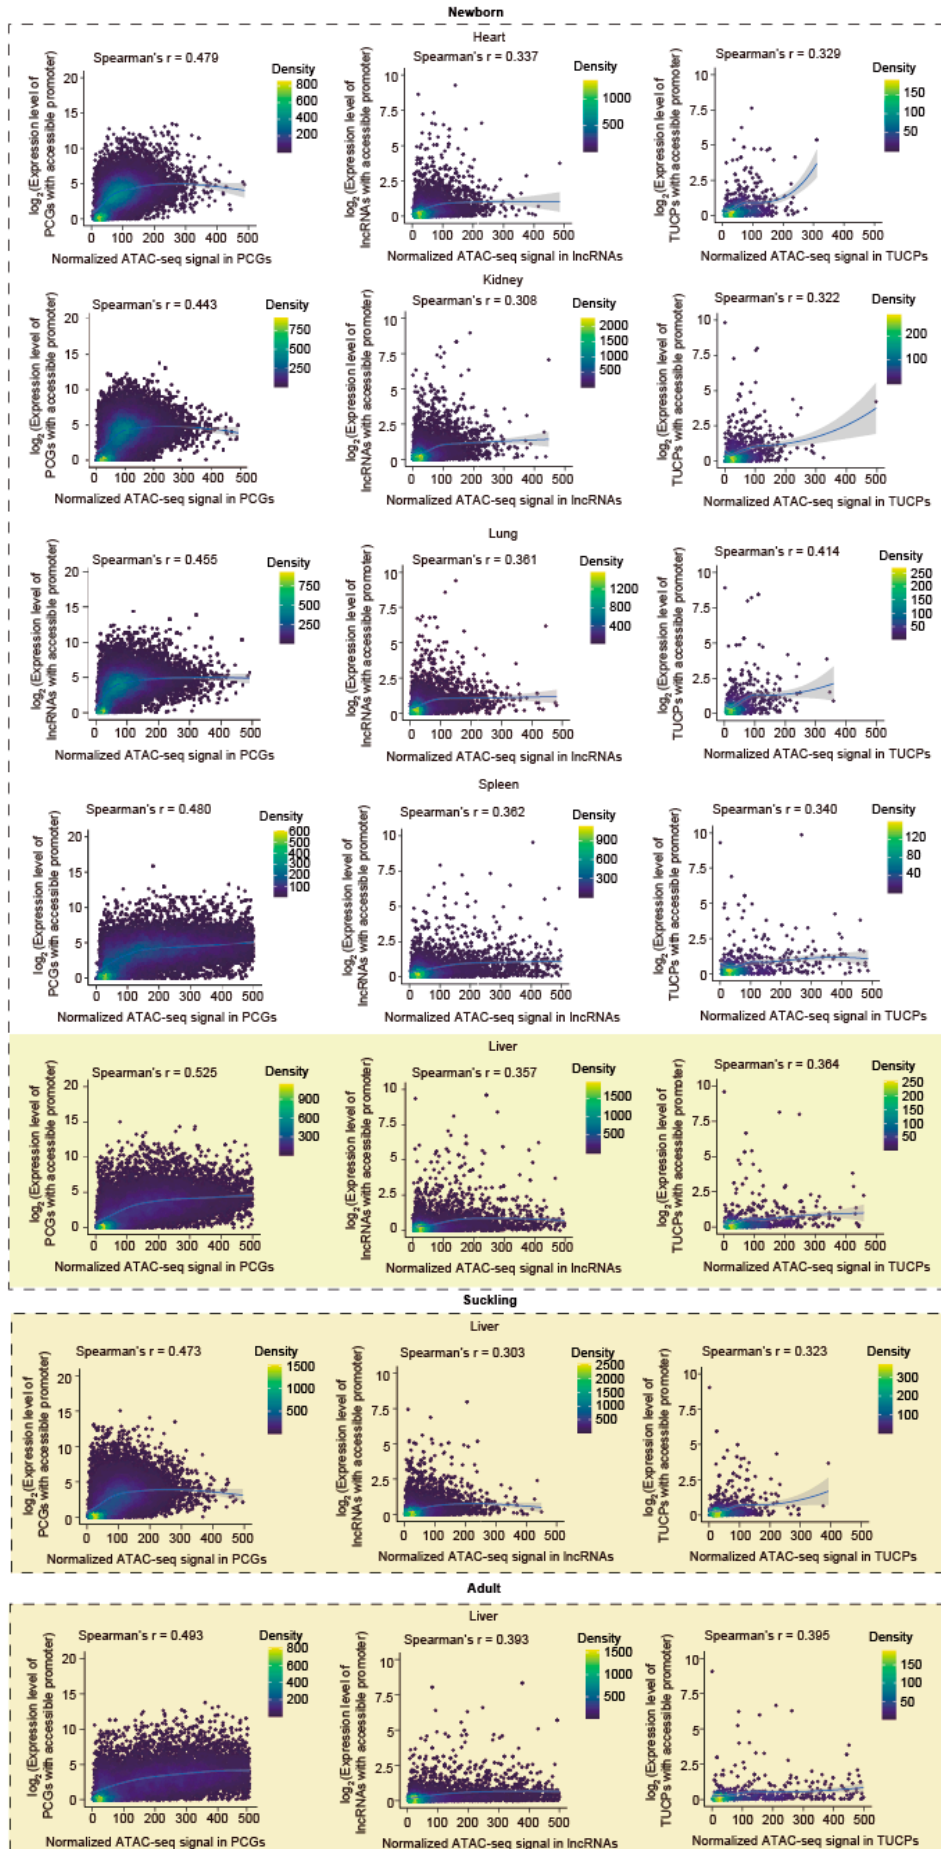

**Figure S8. The correlation between chromatin accessibility (measured by normalized ATAC-seq signal) and gene expression (measured by TPM using RNA-seq data) in five newborn and liver tissues at the sucking and adult stages.** Three types of transcripts are surveyed here, including PCGs, lncRNAs and TUCPs. The gray dashed lines represent the fitting lines. The yellow squares indicate liver samples across developmental stages (i.e., newborn, suckling, and adult).

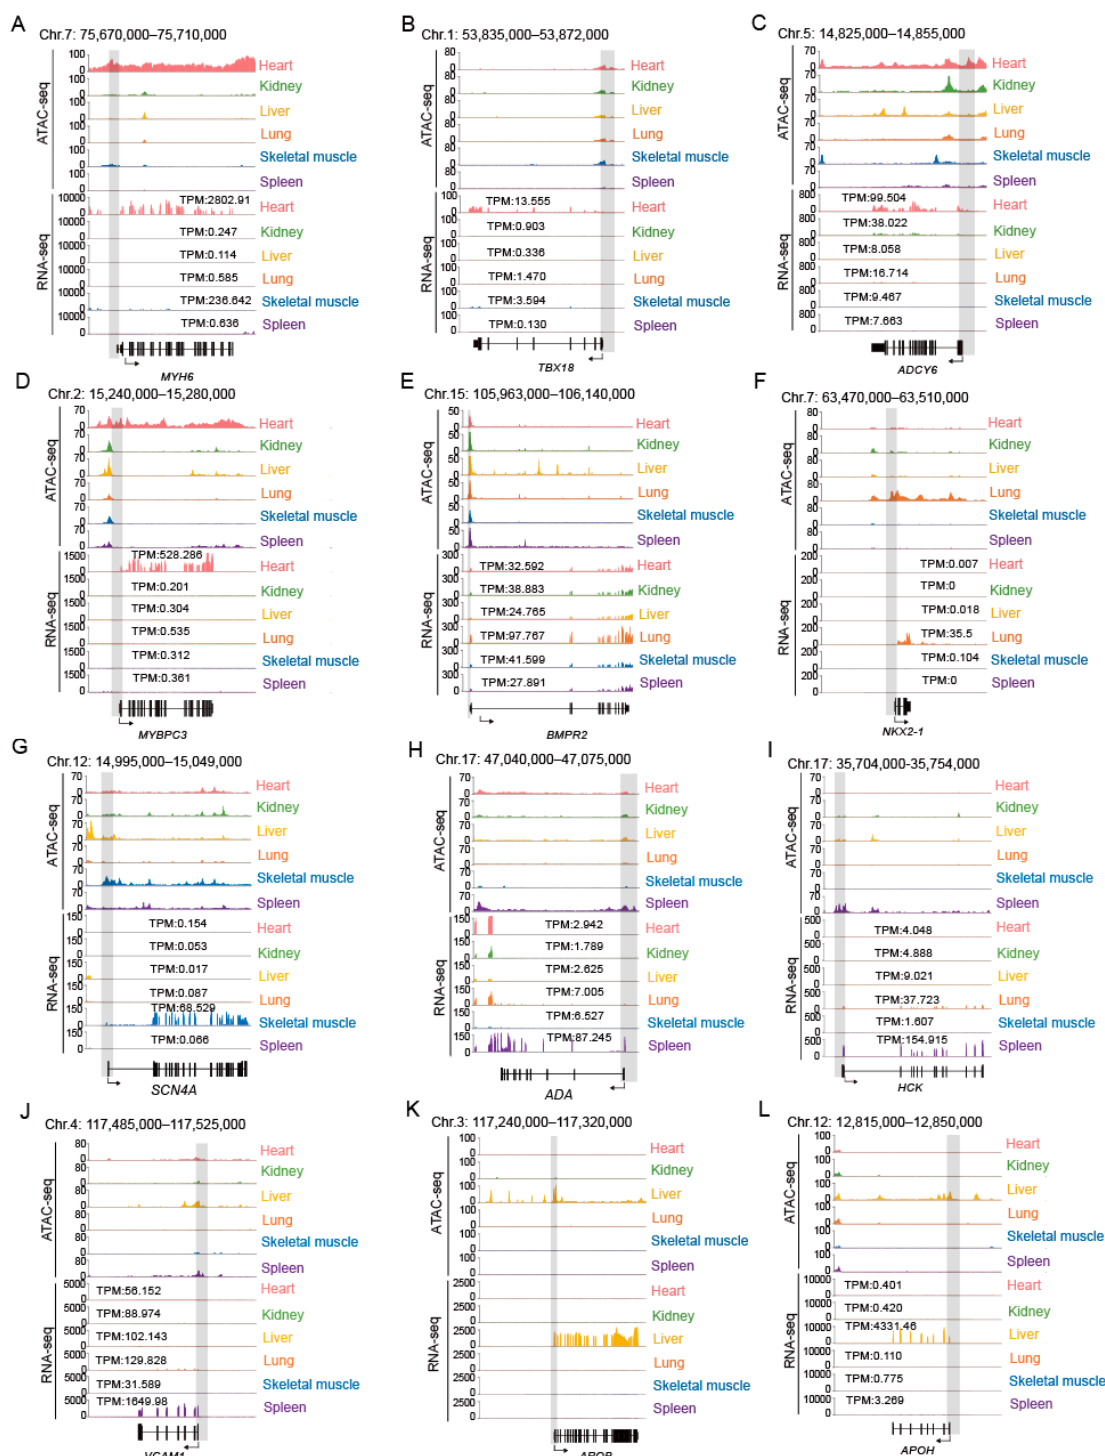

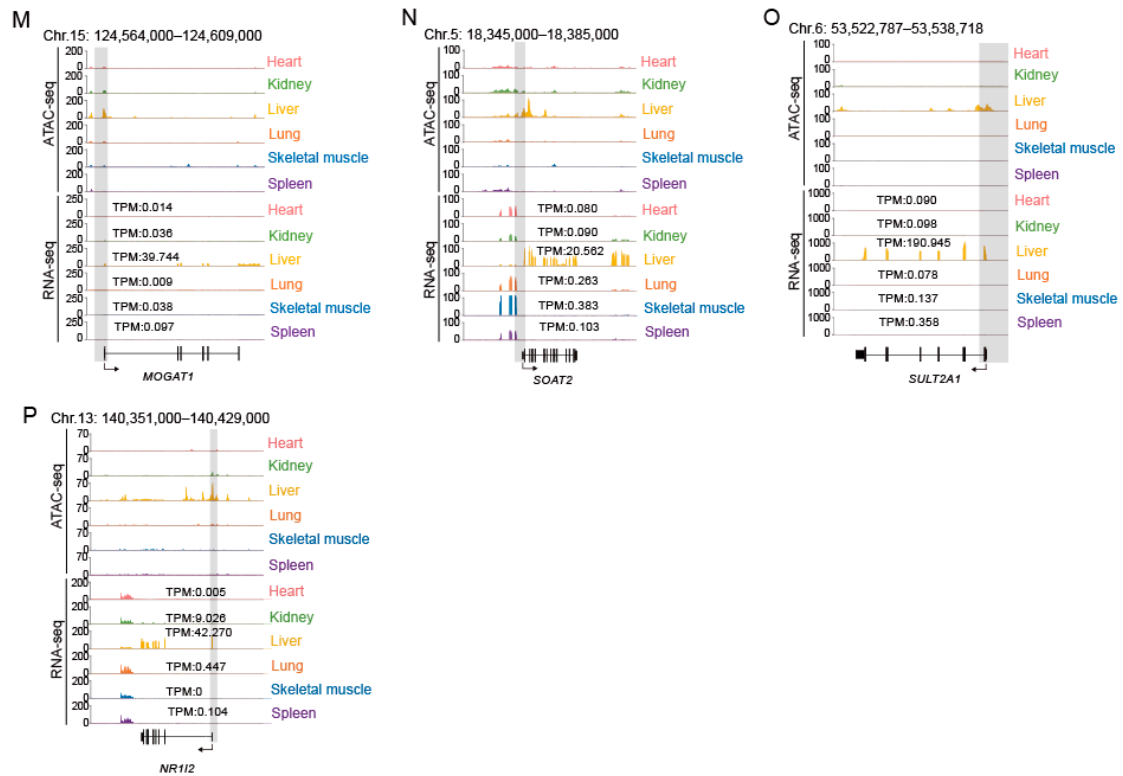

**Figure S9. Representative PCGs with tissue-specific accessible promoters and high expression in the corresponding tissue, including *MYH6* (A), *TBX18* (B), *ADCY6* (C), *MYBPC3* (D), *BMPR2* (E), *NKX2-1* (F), *SCN4A* (G), *ADA* (H), *HCK* (I), *VCAM1* (J), *APOB* (K), *APOH* (L), *MOGAT1* (M), *SOAT2* (N), *SULT2A1* (O), and *NR1I2* (P).** Chromatin accessibility was measured by the normalized ATAC-seq signals (top tracks), while the expression level was measured by normalized RNA-seq counts (bottom tracks) and TPM (beside the RNA-seq signal tracks). The grey squares indicate the promoter regions of corresponding genes.

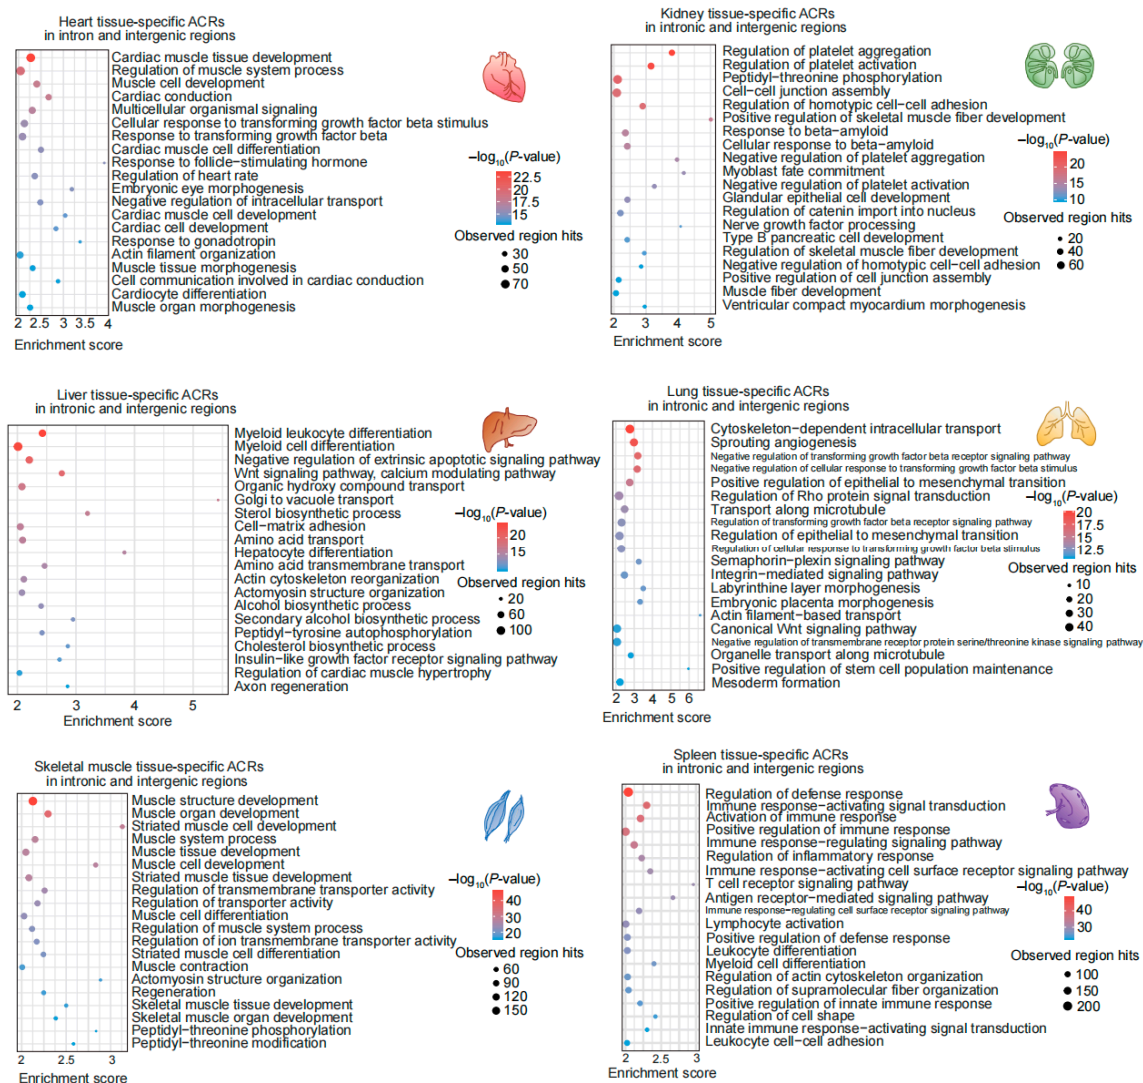

**Figure S10. Enrichment of GO-BP terms for tissue-specific ACRs in the intronic and intergenic regions in the heart, kidney, liver, lung, skeletal muscle and spleen tissue at the newborn stage.**

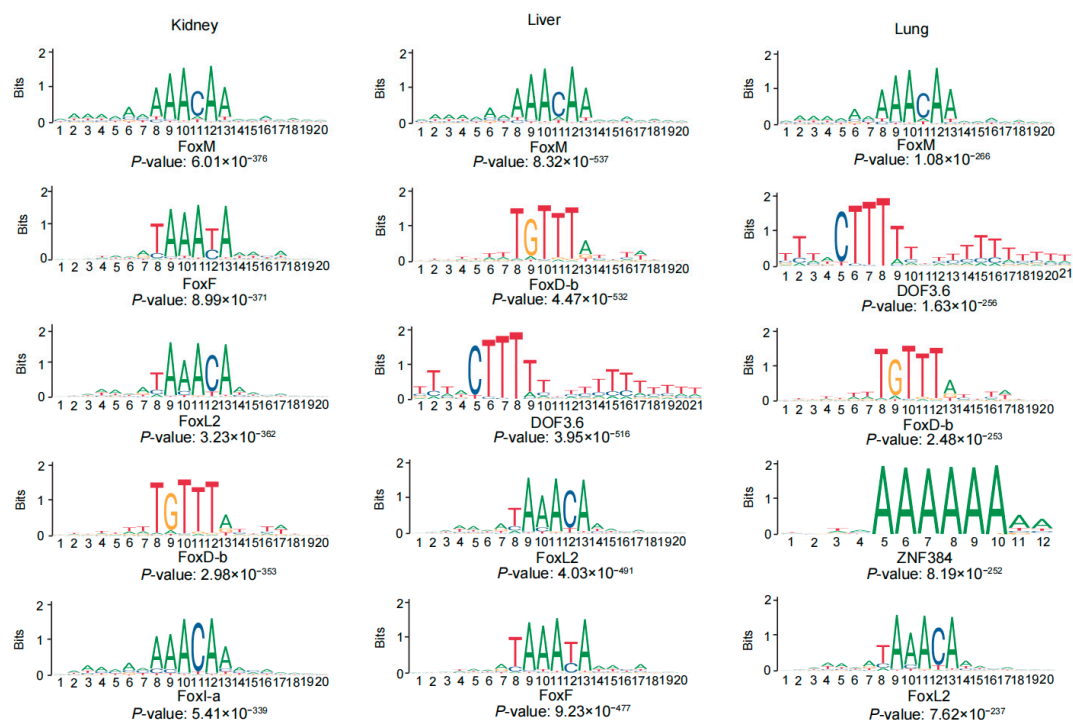

**Figure S11.** The top five enriched TF binding motifs identified in the kidney- (left), liver- (middle), and lung-specific ACRs (right) using the JASPAR database.

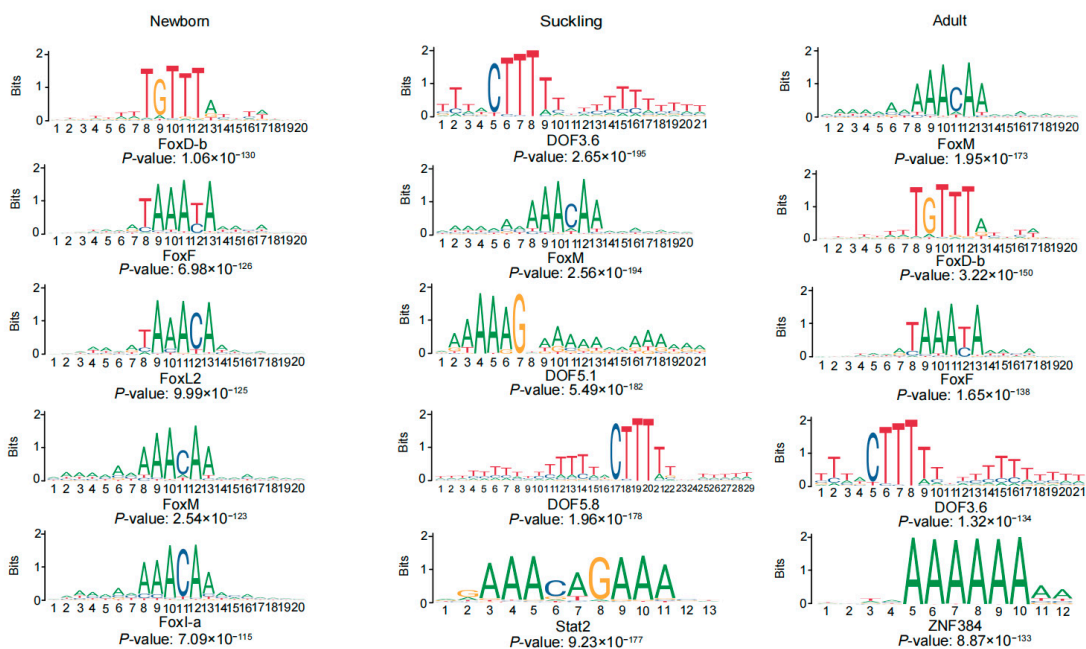

**Figure S12.** The top five enriched TF binding motifs identified in the newborn (left), sucking (middle), and adult stage-specific ACRs (right) of liver using the JASPAR database.

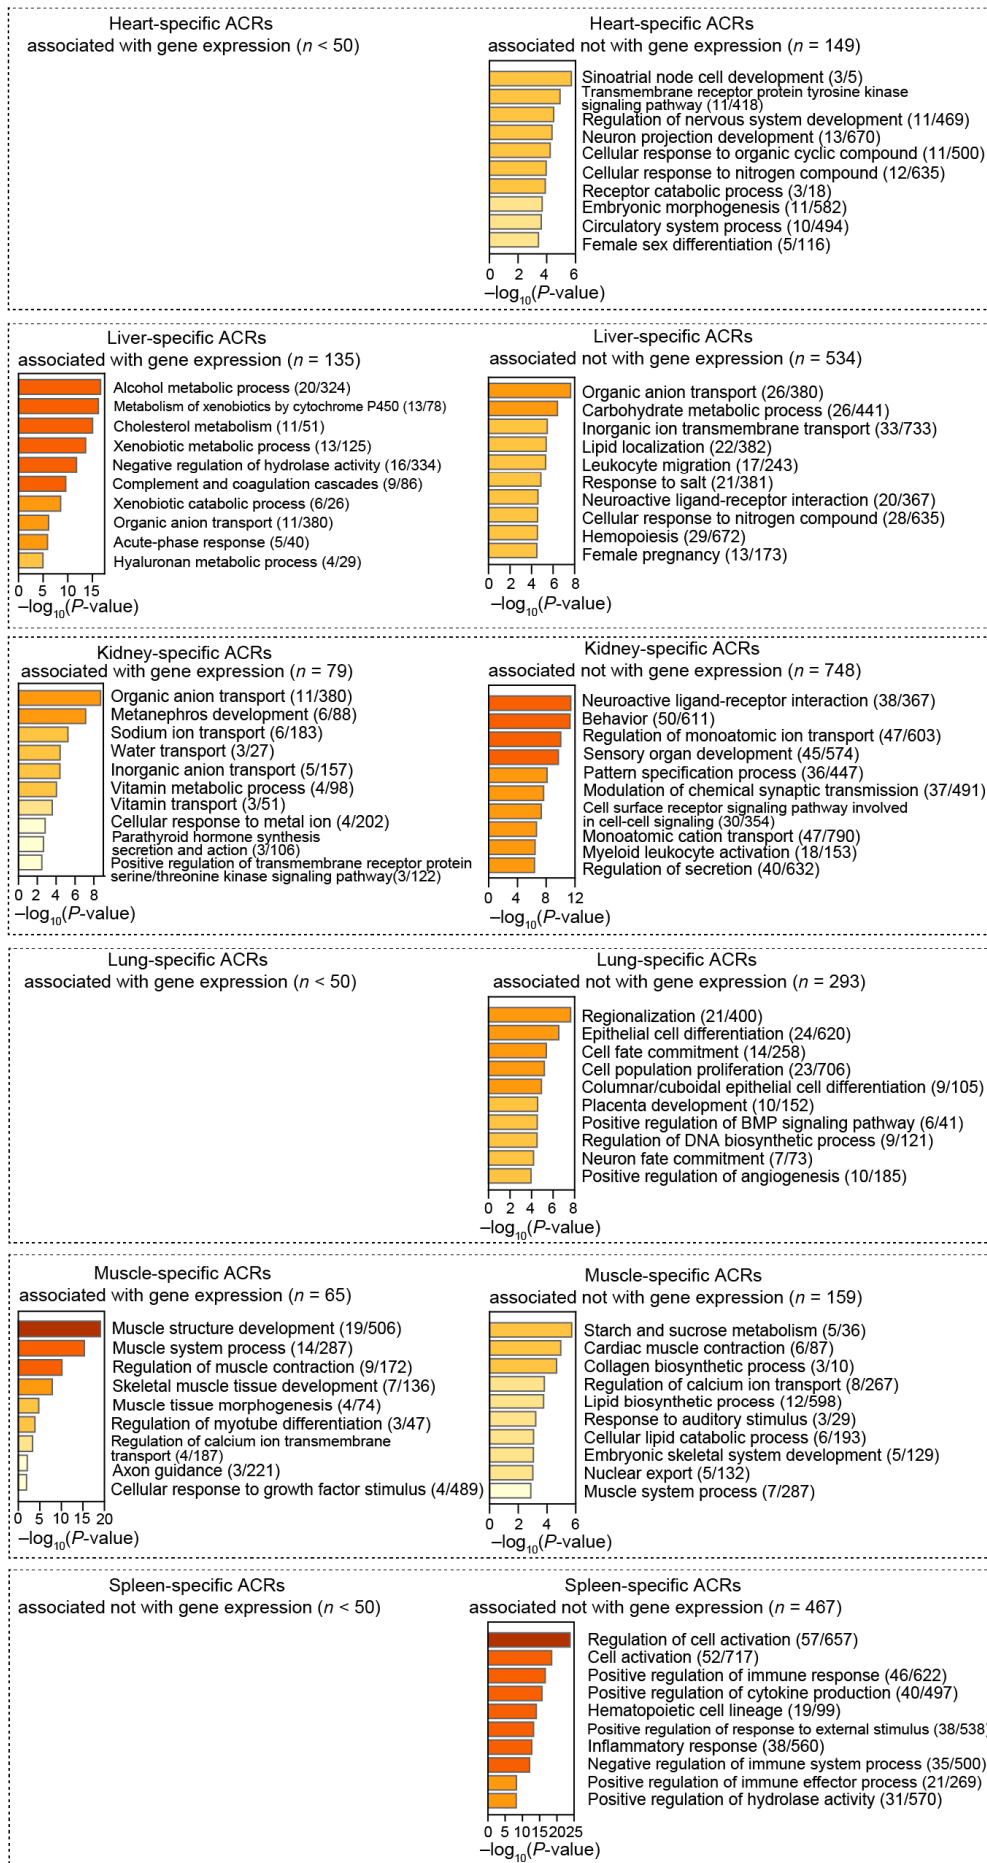

**Figure S13. Top ten enriched terms for the tissue-specific ACRs to PCGs consistent or not with expression levels of tissue-specific gene in heart, kidney, liver, lung, skeletal muscle and spleen in newborn stage.** Only the enriched terms for tissues with >50 tissue-specific PCGs with specific ACRs are shown. Gene enrichment analysis was performed using the software Metascape.

## Supplementary tables

**Table S1. Summary of the ATAC-seq data ( $n = 16$ ) generated in this study.**

| Tissue          | Stages   | Biological replicates | High-quality reads | Mapped reads | Mapping ratio (%) | Informative reads |
|-----------------|----------|-----------------------|--------------------|--------------|-------------------|-------------------|
| Heart           | Newborn  | Rep1                  | 130,710,817        | 95,921,818   | 73.38             | 76,957,416        |
|                 |          | Rep2                  | 82,165,174         | 68,562,123   | 83.44             | 47,472,158        |
| Kidney          | Newborn  | Rep1                  | 116,082,623        | 95,991,269   | 82.69             | 45,825,946        |
|                 |          | Rep2                  | 133,222,601        | 106,621,134  | 80.03             | 56,111,170        |
| Lung            | Newborn  | Rep1                  | 162,983,352        | 127,507,349  | 78.23             | 106,006,361       |
|                 |          | Rep2                  | 157,156,878        | 127,539,132  | 81.15             | 101,964,915       |
| Skeletal muscle | Newborn  | Rep1                  | 128,644,239        | 96,597,915   | 75.09             | 79,274,393        |
|                 |          | Rep2                  | 84,779,458         | 67,044,168   | 79.08             | 51,384,531        |
| Spleen          | Newborn  | Rep1                  | 122,841,002        | 98,587,856   | 80.26             | 81,988,801        |
|                 |          | Rep2                  | 82,447,044         | 70,805,623   | 85.88             | 53,752,771        |
| Liver           | Newborn  | Rep1                  | 161,719,547        | 136,819,053  | 84.60             | 93,913,184        |
|                 |          | Rep2                  | 142,651,033        | 110,285,853  | 77.31             | 67,630,830        |
| Liver           | Suckling | Rep1                  | 137,358,377        | 100,317,502  | 73.03             | 55,182,715        |
|                 |          | Rep2                  | 167,117,020        | 122,646,712  | 73.39             | 72,714,120        |
| Liver           | Adult    | Rep1                  | 157,243,178        | 94,633,060   | 60.18             | 61,540,059        |
|                 |          | Rep2                  | 138,886,466        | 109,345,100  | 78.73             | 79,807,245        |

**Table S2. Detailed information of ATAC-seq peaks, consensus peaks and tissue- or stage-specific peaks identified in the samples ( $n = 16$ ).**

| Tissue          | Stages   | Biological replicates | Peaks numbers | Consensus peak numbers | No. of consensus peaks overlapping with |        |      | No. of tissue- or stage-specific peaks overlapping with |        |      | No. of genes or transcripts overlapping with tissue- or stage-specific peaks |        |      | No. of PCGs with promoters overlapping with peaks |
|-----------------|----------|-----------------------|---------------|------------------------|-----------------------------------------|--------|------|---------------------------------------------------------|--------|------|------------------------------------------------------------------------------|--------|------|---------------------------------------------------|
|                 |          |                       |               |                        | PCG                                     | lncRNA | TUCP | PCG                                                     | lncRNA | TUCP | PCG                                                                          | lncRNA | TUCP |                                                   |
| Heart           | Newborn  | Rep1                  | 160,462       | 72920                  | 38841                                   | 28044  | 3505 | 5565                                                    | 6139   | 679  | 3490                                                                         | 3809   | 422  | 220                                               |
|                 |          | Rep2                  | 141,951       |                        |                                         |        |      |                                                         |        |      |                                                                              |        |      |                                                   |
| Kidney          | Newborn  | Rep1                  | 221,461       | 133254                 | 66502                                   | 54701  | 6980 | 19769                                                   | 21998  | 2702 | 8649                                                                         | 8800   | 1067 | 970                                               |
|                 |          | Rep2                  | 244,304       |                        |                                         |        |      |                                                         |        |      |                                                                              |        |      |                                                   |
| Lung            | Newborn  | Rep1                  | 183,598       | 80657                  | 43335                                   | 30307  | 3765 | 8059                                                    | 8068   | 839  | 4792                                                                         | 4779   | 531  | 410                                               |
|                 |          | Rep2                  | 205,830       |                        |                                         |        |      |                                                         |        |      |                                                                              |        |      |                                                   |
| Skeletal muscle | Newborn  | Rep1                  | 115,523       | 57126                  | 30846                                   | 21334  | 2649 | 5642                                                    | 5939   | 637  | 3442                                                                         | 3538   | 384  | 270                                               |
|                 |          | Rep2                  | 118,584       |                        |                                         |        |      |                                                         |        |      |                                                                              |        |      |                                                   |
| Spleen          | Newborn  | Rep1                  | 173,694       | 84327                  | 45934                                   | 31524  | 3830 | 9982                                                    | 8932   | 926  | 5578                                                                         | 5029   | 571  | 574                                               |
|                 |          | Rep2                  | 149,660       |                        |                                         |        |      |                                                         |        |      |                                                                              |        |      |                                                   |
| Liver           | Newborn  | Rep1                  | 240,651       | 120012                 | 64853                                   | 45111  | 5539 | 17011                                                   | 13839  | 1565 | 8183                                                                         | 6867   | 823  | 824                                               |
|                 |          | Rep2                  | 270,293       |                        |                                         |        |      | 10545                                                   | 9043   | 1061 | 6480                                                                         | 5622   | 668  | 731                                               |
| Liver           | Suckling | Rep1                  | 275,336       | 141689                 | 75237                                   | 53522  | 6875 | 17823                                                   | 15910  | 2199 | 8826                                                                         | 4823   | 1020 | 1028                                              |
|                 |          | Rep2                  | 286,446       |                        |                                         |        |      |                                                         |        |      |                                                                              |        |      |                                                   |
| Liver           | Adult    | Rep1                  | 136,452       | 109003                 | 59707                                   | 40357  | 4705 | 10611                                                   | 8444   | 851  | 5875                                                                         | 7734   | 513  | 612                                               |
|                 |          | Rep2                  | 190,255       |                        |                                         |        |      |                                                         |        |      |                                                                              |        |      |                                                   |

**Table S3. Summary of the RNA-seq data ( $n = 16$ ) used in this study, including 12 newborn porcine tissue samples downloaded from the GSA database.**

| Tissue          | Stages   | Biological replicates | High-quality data (Gb) | Uniquely mapped data (Gb) | Uniquely mapped ratio | Expressed genes number |        |      |
|-----------------|----------|-----------------------|------------------------|---------------------------|-----------------------|------------------------|--------|------|
|                 |          |                       |                        |                           |                       | PCG                    | lncRNA | TUCP |
| Heart           | Newborn  | Rep1                  | 15.98                  | 13.35                     | 83.57                 | 13827                  | 10764  | 1397 |
|                 |          | Rep2                  | 16.13                  | 13.85                     | 85.82                 |                        |        |      |
| Kidney          | Newborn  | Rep1                  | 16.03                  | 13.74                     | 85.7                  | 14777                  | 11921  | 1533 |
|                 |          | Rep2                  | 15.47                  | 13.89                     | 89.8                  |                        |        |      |
| Lung            | Newborn  | Rep1                  | 15.98                  | 12.87                     | 80.55                 | 14860                  | 11421  | 1543 |
|                 |          | Rep2                  | 16.12                  | 13.87                     | 86.03                 |                        |        |      |
| Skeletal muscle | Newborn  | Rep1                  | 16.54                  | 11.91                     | 71.99                 | 13657                  | 11789  | 1601 |
|                 |          | Rep2                  | 15.61                  | 13.01                     | 83.34                 |                        |        |      |
| Spleen          | Newborn  | Rep1                  | 16.00                  | 13.70                     | 85.64                 | 14267                  | 11025  | 1470 |
|                 |          | Rep2                  | 15.74                  | 13.47                     | 85.53                 |                        |        |      |
| Liver           | Newborn  | Rep1                  | 16.48                  | 13.01                     | 78.91                 | 13372                  | 9061   | 1109 |
|                 |          | Rep2                  | 16.84                  | 12.30                     | 73.06                 |                        |        |      |
| Liver           | Suckling | Rep1                  | 15.23                  | 12.29                     | 80.71                 | 12966                  | 6732   | 847  |
|                 |          | Rep2                  | 15.46                  | 12.34                     | 79.79                 |                        |        |      |
| Liver           | Adult    | Rep1                  | 15.43                  | 11.16                     | 72.3                  | 12891                  | 8236   | 1022 |
|                 |          | Rep2                  | 15.45                  | 12.04                     | 77.93                 |                        |        |      |

**Table S4. Detailed information of the top ten TF binding motifs identified in the tissue-specific ATAC-seq peaks.**

| Tissue | Rank | Motif ID* | Alternate ID*  | Consensus*            | P-value*                | E-value*                |
|--------|------|-----------|----------------|-----------------------|-------------------------|-------------------------|
| Heart  | 1    | MA0052.4  | MEF2A          | DDCTAAAAATAGMHH       | $1.12 \times 10^{-199}$ | $6.41 \times 10^{-193}$ |
|        | 2    | MA0497.1  | MEF2C          | DDDCYAAAAATAGMW       | $4.43 \times 10^{-193}$ | $2.11 \times 10^{-186}$ |
|        | 3    | MA0940.1  | AP1            | MYAAAAAWRGAAA         | $1.39 \times 10^{-112}$ | $1.00 \times 10^{-105}$ |
|        | 4    | MA1623.1  | Stat2          | RGAAACAGAAASH         | $1.32 \times 10^{-111}$ | $8.37 \times 10^{-105}$ |
|        | 5    | MA0660.1  | MEF2B          | RCTAWAAATAGC          | $1.56 \times 10^{-109}$ | $1.79 \times 10^{-103}$ |
|        | 6    | MA0773.1  | MEF2D          | DCTAWAAATAGM          | $8.99 \times 10^{-103}$ | $1.01 \times 10^{-96}$  |
|        | 7    | MA1274.1  | DOF3.6         | TTTWCTTTTTHHYTTTTTTT  | $2.35 \times 10^{-99}$  | $1.24 \times 10^{-92}$  |
|        | 8    | MA1823.1  | Zm00001d027846 | RRAAGAAAAARR          | $2.77 \times 10^{-94}$  | $2.48 \times 10^{-87}$  |
|        | 9    | MA0543.1  | eor-1          | RRAGAGASRSAGAGA       | $6.38 \times 10^{-93}$  | $3.54 \times 10^{-86}$  |
|        | 10   | MA1871.1  | FoxM           | HAAAMAHAACAHAHMAHAAH  | $4.39 \times 10^{-92}$  | $3.16 \times 10^{-85}$  |
| Kidney | 1    | MA0052.4  | MEF2A          | DDCTAAAAATAGMHH       | $1.12 \times 10^{-199}$ | $6.41 \times 10^{-193}$ |
|        | 2    | MA0497.1  | MEF2C          | DDDCYAAAAATAGMW       | $4.43 \times 10^{-193}$ | $2.11 \times 10^{-186}$ |
|        | 3    | MA0940.1  | AP1            | MYAAAAAWRGAAA         | $1.39 \times 10^{-112}$ | $1 \times 10^{-105}$    |
|        | 4    | MA1623.1  | Stat2          | RGAAACAGAAASH         | $1.32 \times 10^{-111}$ | $8.37 \times 10^{-105}$ |
|        | 5    | MA0660.1  | MEF2B          | RCTAWAAATAGC          | $1.56 \times 10^{-109}$ | $1.79 \times 10^{-103}$ |
|        | 6    | MA0773.1  | MEF2D          | DCTAWAAATAGM          | $8.99 \times 10^{-103}$ | $1.01 \times 10^{-96}$  |
|        | 7    | MA1274.1  | DOF3.6         | TTTWCTTTTTHHYTTTTTTT  | $2.35 \times 10^{-99}$  | $1.24 \times 10^{-92}$  |
|        | 8    | MA1823.1  | Zm00001d027846 | RRAAGAAAAARR          | $2.77 \times 10^{-94}$  | $2.48 \times 10^{-87}$  |
|        | 9    | MA0543.1  | eor-1          | RRAGAGASRSAGAGA       | $6.38 \times 10^{-93}$  | $3.54 \times 10^{-86}$  |
|        | 10   | MA1871.1  | FoxM           | HAAAMAHAACAHAHMAHAAH  | $4.39 \times 10^{-92}$  | $3.16 \times 10^{-85}$  |
| Liver  | 1    | MA1871.1  | FoxM           | HAAAMAHAACAHAHMAHAAH  | $6.51 \times 10^{-541}$ | $1.63 \times 10^{-533}$ |
|        | 2    | MA1862.1  | FoxD-b         | DDDTDWWTGTTAYDTWDNN   | $3.43 \times 10^{-536}$ | $8.74 \times 10^{-529}$ |
|        | 3    | MA1274.1  | DOF3.6         | TTTWCTTTTTHHYTTTTTTT  | $4.38 \times 10^{-520}$ | $7.72 \times 10^{-513}$ |
|        | 4    | MA1870.1  | FoxL2          | NHWWAHATAAACAAWHMHAAH | $3.28 \times 10^{-495}$ | $7.88 \times 10^{-488}$ |

|                 |    |          |         |                               |                         |                         |
|-----------------|----|----------|---------|-------------------------------|-------------------------|-------------------------|
|                 | 5  | MA1864.1 | FoxF    | NNNHHWATAAATAWWHANHN          | $9.07 \times 10^{-481}$ | $1.81 \times 10^{-473}$ |
|                 | 6  | MA1869.1 | FoxK    | NDDDDDDTGTTTAYDDNNN           | $6.63 \times 10^{-472}$ | $1.84 \times 10^{-464}$ |
|                 | 7  | MA1281.1 | DOF5.1  | RAAAAAGWAAAAAARAAAAA          | $2.15 \times 10^{-456}$ | $3.67 \times 10^{-449}$ |
|                 | 8  | MA1267.1 | DOF5.8  | WHTTTTTTHYTTTTTACTTTTTNHTTTWW | $6.11 \times 10^{-450}$ | $9.70 \times 10^{-443}$ |
|                 | 9  | MA1866.1 | FoxI-a  | HWAHAHAHAACAAAMMHNN           | $2.17 \times 10^{-443}$ | $5.62 \times 10^{-436}$ |
|                 | 10 | MA1125.1 | ZNF384  | DNWMAAAAAA                    | $2.69 \times 10^{-432}$ | $4.51 \times 10^{-425}$ |
| Lung            | 1  | MA1871.1 | FoxM    | HAAAMAHAAACAAMAHANN           | $1.67 \times 10^{-270}$ | $2.12 \times 10^{-263}$ |
|                 | 2  | MA1274.1 | DOF3.6  | TTTWCTTTTTTHYTTTTTTTT         | $3.37 \times 10^{-260}$ | $3.19 \times 10^{-253}$ |
|                 | 3  | MA1862.1 | FoxD-b  | DDDDWWTGTTTAYDTWNN            | $3.74 \times 10^{-257}$ | $4.85 \times 10^{-250}$ |
|                 | 4  | MA1125.1 | ZNF384  | DNWMAAAAAA                    | $1.74 \times 10^{-255}$ | $1.6 \times 10^{-248}$  |
|                 | 5  | MA1870.1 | FoxL2   | NHWWAHATAAACAAWHMHHH          | $1.22 \times 10^{-240}$ | $1.49 \times 10^{-233}$ |
|                 | 6  | MA1864.1 | FoxF    | NNNHHWATAAATAWWHANHN          | $5.24 \times 10^{-226}$ | $5.28 \times 10^{-219}$ |
|                 | 7  | MA1869.1 | FoxK    | NDDDDDDTGTTTAYDDNNN           | $6.78 \times 10^{-220}$ | $9.41 \times 10^{-213}$ |
|                 | 8  | MA1267.1 | DOF5.8  | WHTTTTTTHYTTTTTACTTTTTNHTTTWW | $4.39 \times 10^{-212}$ | $3.7 \times 10^{-205}$  |
|                 | 9  | MA1866.1 | FoxI-a  | HWAHAHAHAACAAAMMHNN           | $2.34 \times 10^{-205}$ | $2.98 \times 10^{-198}$ |
|                 | 10 | MA1281.1 | DOF5.1  | RAAAAAGWAAAAAARAAAAA          | $8.78 \times 10^{-201}$ | $7.93 \times 10^{-194}$ |
| Skeletal muscle | 1  | MA0052.4 | MEF2A   | DDCTAAAAATAGMHH               | $1.32 \times 10^{-170}$ | $7.42 \times 10^{-164}$ |
|                 | 2  | MA0497.1 | MEF2C   | DDDCYAAAAATAGMW               | $1.79 \times 10^{-155}$ | $8.23 \times 10^{-149}$ |
|                 | 3  | MA1845.1 | Atoh7   | NNNNRRCAGCTGTNNNNNN           | $8.17 \times 10^{-154}$ | $8.35 \times 10^{-147}$ |
|                 | 4  | MA1100.2 | ASCL1   | VGCAGCTGCN                    | $1.45 \times 10^{-148}$ | $1.63 \times 10^{-141}$ |
|                 | 5  | MA0499.2 | MYOD1   | NNGCACCTGTCNB                 | $4.22 \times 10^{-141}$ | $3.51 \times 10^{-134}$ |
|                 | 6  | MA0816.1 | Ascl2   | ARCAGCTGCT                    | $5.29 \times 10^{-135}$ | $3.83 \times 10^{-128}$ |
|                 | 7  | MA1641.1 | MYF5    | NVACAGCTGTBN                  | $4 \times 10^{-134}$    | $3.01 \times 10^{-127}$ |
|                 | 8  | MA1472.2 | Bhlha15 | NVACAGCTGTBN                  | $5.99 \times 10^{-133}$ | $4.45 \times 10^{-126}$ |
|                 | 9  | MA1619.1 | Ptf1A   | NNACAGCTGTNN                  | $7.55 \times 10^{-129}$ | $5.96 \times 10^{-122}$ |
|                 | 10 | MA0521.2 | Tcf12   | NNACAGCTGTNN                  | $1.63 \times 10^{-127}$ | $1.23 \times 10^{-120}$ |

|        |    |          |       |                      |                         |                         |
|--------|----|----------|-------|----------------------|-------------------------|-------------------------|
| Spleen | 1  | MA1853.1 | Erf-a | NNNNRNCGGAAGTNNNNNNN | $3.76 \times 10^{-500}$ | $5.94 \times 10^{-493}$ |
|        | 2  | MA0080.6 | Spi1  | RRAAAGAGGAAGTGGDD    | $6.47 \times 10^{-484}$ | $8.77 \times 10^{-477}$ |
|        | 3  | MA0598.3 | EHF   | NNCACTTCCTGTTNN      | $5.35 \times 10^{-474}$ | $7.71 \times 10^{-467}$ |
|        | 4  | MA0081.2 | SPIB  | TYTCACTTCCTCTTTY     | $3.55 \times 10^{-425}$ | $4.37 \times 10^{-418}$ |
|        | 5  | MA0474.3 | Erg   | NNACAGGAAGTGVN       | $4.58 \times 10^{-425}$ | $6.55 \times 10^{-418}$ |
|        | 6  | MA0640.2 | ELF3  | NNCCACTTCCTGNT       | $1.77 \times 10^{-412}$ | $2.79 \times 10^{-405}$ |
|        | 7  | MA0761.2 | ETV1  | NNACAGGAAGTGNN       | $2.77 \times 10^{-391}$ | $3.94 \times 10^{-384}$ |
|        | 8  | MA0062.3 | GABPA | NNCACTTCCTGTNN       | $5.15 \times 10^{-389}$ | $7.63 \times 10^{-382}$ |
|        | 9  | MA0136.3 | Elf5  | RVAAGGAAGTNN         | $9.89 \times 10^{-369}$ | $1.66 \times 10^{-361}$ |
|        | 10 | MA1508.1 | IKZF1 | VVAACAGGAARN         | $3.56 \times 10^{-365}$ | $6.18 \times 10^{-358}$ |

\*Motif ID: The name of the motif, which is unique in the JASPAR database.

\*Alternate ID: An alternate name for the motif that may be provided in the JASPAR database.

\*Consensus: A consensus sequence computed from the motif.

\*P-value: The optimal enrichment p-value of the motif according to the statistical test, adjusted for multiple tests using a Bonferroni correction.

\*E-value: The expected number of random motifs that would be as enriched in the (primary) sequences as this one. The E-value is the adjusted p-value multiplied by the number of motifs in the motif file.

**Table S5. Detailed information of the top ten TF binding motifs identified in the stage-specific ATAC-seq peaks.**

| Tissue   | Rank | Motif ID | Alternate ID   | Consensus                     | P-value                 | E-value                 |
|----------|------|----------|----------------|-------------------------------|-------------------------|-------------------------|
| Newborn  | 1    | MA1862.1 | FoxD-b         | DDDTDWWTGTTTAYDTWDNN          | $2.91 \times 10^{-134}$ | $2.07 \times 10^{-127}$ |
|          | 2    | MA1864.1 | FoxF           | NNNHWHATAAATAWWHANHN          | $2.41 \times 10^{-129}$ | $1.37 \times 10^{-122}$ |
|          | 3    | MA1870.1 | FoxL2          | NHWWAHATAAACAAWHMHHH          | $2.85 \times 10^{-128}$ | $1.95 \times 10^{-121}$ |
|          | 4    | MA1871.1 | FoxM           | HAAAMAHAACAAHMAHAHH           | $7.25 \times 10^{-127}$ | $4.96 \times 10^{-120}$ |
|          | 5    | MA1866.1 | Foxl-a         | HWAHAHAACAAAMMHHHN            | $1.92 \times 10^{-118}$ | $1.39 \times 10^{-111}$ |
|          | 6    | MA1869.1 | FoxK           | NDDDDDDTGTTTAYDDNNN           | $8.35 \times 10^{-116}$ | $6.71 \times 10^{-109}$ |
|          | 7    | MA1274.1 | DOF3.6         | TTTWCTTTTHHYTTTTTTT           | $5.72 \times 10^{-113}$ | $2.52 \times 10^{-106}$ |
|          | 8    | MA1623.1 | Stat2          | RGAAACAGAAASH                 | $3.21 \times 10^{-105}$ | $1.88 \times 10^{-98}$  |
|          | 9    | MA1281.1 | DOF5.1         | RAAAAAGWAAAAAARAAAAA          | $5.51 \times 10^{-105}$ | $2.35 \times 10^{-98}$  |
|          | 10   | MA1267.1 | DOF5.8         | WHTTTTTTHYTTTTTACTTTTTNHTTTWW | $4.54 \times 10^{-103}$ | $1.74 \times 10^{-96}$  |
| Suckling | 1    | MA1274.1 | DOF3.6         | TTTWCTTTTHHYTTTTTTT           | $8.68 \times 10^{-199}$ | $5.18 \times 10^{-192}$ |
|          | 2    | MA1871.1 | FoxM           | HAAAMAHAACAAHMAHAHH           | $5.72 \times 10^{-198}$ | $5.01 \times 10^{-191}$ |
|          | 3    | MA1281.1 | DOF5.1         | RAAAAAGWAAAAAARAAAAA          | $1.9 \times 10^{-185}$  | $1.07 \times 10^{-178}$ |
|          | 4    | MA1267.1 | DOF5.8         | WHTTTTTTHYTTTTTACTTTTTNHTTTWW | $1.2 \times 10^{-181}$  | $5.79 \times 10^{-175}$ |
|          | 5    | MA1623.1 | Stat2          | RGAAACAGAAASH                 | $2.1 \times 10^{-180}$  | $1.81 \times 10^{-173}$ |
|          | 6    | MA0940.1 | AP1            | MYAAAAAWRGAAA                 | $9.6 \times 10^{-170}$  | $8.16 \times 10^{-163}$ |
|          | 7    | MA1125.1 | ZNF384         | DNWMAAAAAA                    | $1.53 \times 10^{-163}$ | $7.48 \times 10^{-157}$ |
|          | 8    | MA0002.2 | Runx1          | BBYGTGGTTT                    | $8.93 \times 10^{-163}$ | $1.44 \times 10^{-155}$ |
|          | 9    | MA1866.1 | Foxl-a         | HWAHAHAACAAAMMHHHN            | $2.42 \times 10^{-162}$ | $2.35 \times 10^{-155}$ |
|          | 10   | MA1823.1 | Zm00001d027846 | RRAAGAAAAARR                  | $6.76 \times 10^{-161}$ | $7.32 \times 10^{-154}$ |
| Adult    | 1    | MA1871.1 | FoxM           | HAAAMAHAACAAHMAHAHH           | $3.83 \times 10^{-177}$ | $3.82 \times 10^{-170}$ |
|          | 2    | MA1862.1 | FoxD-b         | DDDTDWWTGTTTAYDTWDNN          | $6.46 \times 10^{-154}$ | $6.29 \times 10^{-147}$ |
|          | 3    | MA1864.1 | FoxF           | NNNHWHATAAATAWWHANHN          | $4.53 \times 10^{-142}$ | $3.24 \times 10^{-135}$ |

|    |          |        |                              |                         |                         |
|----|----------|--------|------------------------------|-------------------------|-------------------------|
| 4  | MA1274.1 | DOF3.6 | TTTWCTTTTTTHHYTTTTTTTT       | $3.66 \times 10^{-138}$ | $2.58 \times 10^{-131}$ |
| 5  | MA1125.1 | ZNF384 | DNWMAAAAAAAAA                | $2.44 \times 10^{-136}$ | $1.73 \times 10^{-129}$ |
| 6  | MA1870.1 | FoxL2  | NHWWAHATAAACAAWHMHHH         | $2.43 \times 10^{-133}$ | $2.19 \times 10^{-126}$ |
| 7  | MA1866.1 | Foxl-a | HWAHAHAACAAAMMHHHN           | $6.13 \times 10^{-125}$ | $6.03 \times 10^{-118}$ |
| 8  | MA1267.1 | DOF5.8 | WHTTTTTTHYTTTTTACTTTTTNHTTWW | $4.83 \times 10^{-118}$ | $3.10 \times 10^{-111}$ |
| 9  | MA1869.1 | FoxK   | NDDDDDDTGTTTAYDDNNN          | $2.32 \times 10^{-111}$ | $2.39 \times 10^{-104}$ |
| 10 | MA1281.1 | DOF5.1 | RAAAAAGWAAAAAARAAAAA         | $3.82 \times 10^{-108}$ | $2.53 \times 10^{-101}$ |
